# Supplementary material for: Fetal Exposure to Parental Smoking and the Risk of Type 2 Diabetes in Adult Women
Source: Oxford University Press journal article supplement (doi:10.2337/dc13-1679), 2014-08-05
Supplement: dc131679supplementarydata.pdf [file dc131679supplementarydata.pdf]

# SUPPLEMENTARY DATA

**Supplementary Table 1.** Age-standardized maternal, paternal and offspring characteristics according to maternal smoking during pregnancy subcategory in participants of the Nurses' Health Study II cohort.

|                                                    | Maternal cigarette smoking during pregnancy          |                                                                 |                                                                      |                                                                      |
|----------------------------------------------------|------------------------------------------------------|-----------------------------------------------------------------|----------------------------------------------------------------------|----------------------------------------------------------------------|
|                                                    | No maternal smoking during pregnancy<br>(N = 25,518) | Quit smoking during first trimester of pregnancy<br>(N = 1,137) | Continued smoking during pregnancy <15 cigarettes/day<br>(N = 4,405) | Continued smoking during pregnancy ≥15 cigarettes/day<br>(N = 2,736) |
| <b>Maternal characteristics</b>                    |                                                      |                                                                 |                                                                      |                                                                      |
| Age at daughter's birth (years)                    | 26.4 (5.1)                                           | 25.4 (4.5)                                                      | 26.2 (4.7)                                                           | 25.8 (4.6)                                                           |
| Pre-pregnancy body mass index (kg/m <sup>2</sup> ) | 21.4 (2.7)                                           | 20.9 (2.4)                                                      | 20.9 (2.5)                                                           | 21.0 (2.7)                                                           |
| Weight gain during pregnancy < 9.1 kg (%)          | 35                                                   | 28                                                              | 37                                                                   | 35                                                                   |
| Attended college (%)                               | 35                                                   | 43                                                              | 41                                                                   | 38                                                                   |
| Professional occupation (%)                        | 3                                                    | 4                                                               | 3                                                                    | 3                                                                    |
| History of diabetes (%)                            | 11                                                   | 9                                                               | 9                                                                    | 11                                                                   |
| <b>Paternal characteristics</b>                    |                                                      |                                                                 |                                                                      |                                                                      |
| Age at daughter's birth (years)                    | 29.2 (5.7)                                           | 28.1 (5.3)                                                      | 29.1 (5.4)                                                           | 28.9 (5.3)                                                           |
| Body mass index (kg/m <sup>2</sup> )               | 23.6 (2.8)                                           | 23.5 (2.9)                                                      | 23.6 (2.7)                                                           | 23.5 (2.8)                                                           |
| Attended college (%)                               | 41                                                   | 50                                                              | 49                                                                   | 46                                                                   |
| Professional occupation (%)                        | 30                                                   | 34                                                              | 33                                                                   | 34                                                                   |
| Smoked during pregnancy (%)                        | 50                                                   | 75                                                              | 79                                                                   | 80                                                                   |
| History of Diabetes (%)                            | 16                                                   | 15                                                              | 16                                                                   | 15                                                                   |
| Family owned house at daughter's birth (%)         | 49                                                   | 38                                                              | 44                                                                   | 43                                                                   |
| <b>Pregnancy and childhood characteristics</b>     |                                                      |                                                                 |                                                                      |                                                                      |
| Gestational age at birth (weeks)                   | 39.4 (2.3)                                           | 39.5 (2.4)                                                      | 39.3 (2.4)                                                           | 39.2 (2.5)                                                           |
| Birth weight (g)                                   | 3,335 (503)                                          | 3,256 (512)                                                     | 3,159 (510)                                                          | 3,116 (517)                                                          |
| Ethnicity white (%)                                | 96                                                   | 96                                                              | 97                                                                   | 98                                                                   |
| Breastfed in infancy (%)                           | 56                                                   | 46                                                              | 43                                                                   | 44                                                                   |
| Body mass index at age 18 (kg/m <sup>2</sup> )     | 21.0 (3.1)                                           | 21.1 (3.1)                                                      | 21.3 (3.2)                                                           | 21.6 (3.5)                                                           |
| <b>Adulthood characteristics</b>                   |                                                      |                                                                 |                                                                      |                                                                      |
| Age (years) <sup>a</sup>                           | 34.4 (4.7)                                           | 33.8 (4.5)                                                      | 34.1 (4.5)                                                           | 33.3 (4.4)                                                           |
| Height (cm)                                        | 165 (7)                                              | 165 (7)                                                         | 165 (7)                                                              | 164 (6)                                                              |
| Body mass index (kg/m <sup>2</sup> )               | 23.6 (4.7)                                           | 23.6 (4.7)                                                      | 23.8 (4.7)                                                           | 24.2 (5.0)                                                           |

# SUPPLEMENTARY DATA

|                                             |             |             |             |             |
|---------------------------------------------|-------------|-------------|-------------|-------------|
| Current smoking behaviour                   |             |             |             |             |
| - Never (%)                                 | 71          | 62          | 61          | 62          |
| - Past (%)                                  | 20          | 25          | 25          | 24          |
| - Current <15 cigarettes/day (%)            | 4           | 6           | 6           | 5           |
| - Current =>15 cigarettes/day (%)           | 5           | 7           | 8           | 10          |
| Pretax household income >75,000 dollar (%)  | 55          | 61          | 58          | 60          |
| Husband attended college (%)                | 81          | 83          | 84          | 83          |
| Alcohol intake (g/day)                      | 2.9 (5.7)   | 3.6 (5.4)   | 3.8 (6.8)   | 3.7 (7.0)   |
| Total energy intake (kcal/day)              | 1,808 (539) | 1,786 (509) | 1,787(537)  | 1,767(528)  |
| Physical activity (MET-hrs/wk) <sup>b</sup> | 24.0 (34.0) | 24.6 (32.6) | 25.0 (34.6) | 25.8 (38.5) |

Values are means (SD) unless indicated otherwise and are standardized to the age distribution of the study population.

<sup>a</sup>Mothers with information on smoking duration and number of cigarettes smoked available

<sup>b</sup>Value is not age adjusted

<sup>c</sup>Metabolic equivalents (MET) hours per week from recreational and leisure-time activities

# SUPPLEMENTARY DATA

**Supplementary Table 2.** Mediation by birth weight for the associations of maternal and paternal cigarette smoking during pregnancy in different periods of pregnancy with the risk of type 2 diabetes in participants of the Nurses' Health Study II cohort during 20 years of follow-up (1989 – 2009).

|                                      | Explained proportion of<br>effect estimates<br>(95% Confidence Interval) | P-value |
|--------------------------------------|--------------------------------------------------------------------------|---------|
| <b>Maternal smoking</b>              |                                                                          |         |
| Non-smoker                           | Reference                                                                |         |
| Quit smoking in<br>1st trimester     | 10.8% (-0.7%, 22.3%)                                                     | 0.07    |
| Continued smoking<br><15 cigarettes  | 26.9% (-11.2%, 65.0%)                                                    | 0.17    |
| Continued smoking<br>≥ 15 cigarettes | 43.0% (-35.1%, 121.1%)                                                   | 0.28    |
| <b>Paternal smoking</b>              |                                                                          |         |
| Non-smoker                           | Reference                                                                |         |
| <15 cigarettes                       | 7.2% (-4.0%, 18.4%)                                                      | 0.21    |
| ⇒ 15 cigarettes                      | 5.5% (-1.9%, 12.8%)                                                      | 0.14    |

Proportion of the associations of parental smoking during pregnancy and adult risk of type 2 diabetes (as presented in Table 2) explained by birth weight was explored by using a SAS macro that calculates the explained proportion by each intermediate variable (Mediate SAS; Harvard School of Public Health; available at <http://www.hsph.harvard.edu/faculty/donna-spiegelman/software/mediate>) (25). This analysis was performed for both statistically significant and non-significant effect estimates and gives for birth weight, as mediating factor, the explaining percentage and 95% Confidence Interval.

# SUPPLEMENTARY DATA

**Supplementary Table 3.** Mediation by adult body mass index for the associations of maternal and paternal cigarette smoking during pregnancy in different periods of pregnancy with the risk of type 2 diabetes in participants of the Nurses' Health Study II cohort during 20 years of follow-up (1989 – 2009).

|                                   | Explained proportion of effect estimates<br>(95% Confidence Interval) | P-value |
|-----------------------------------|-----------------------------------------------------------------------|---------|
| <b>Maternal smoking</b>           |                                                                       |         |
| Non-smoker                        | Reference                                                             |         |
| Quit smoking in 1st trimester     | -1.6% (-30.9%, 27.6%)                                                 | 0.91    |
| Continued smoking <15 cigarettes  | 37.4% (-29.0%, 103.8%)                                                | 0.27    |
| Continued smoking ≥ 15 cigarettes | 59.4% (-58.9%, 177.7%)                                                | 0.33    |
| <b>Paternal smoking</b>           |                                                                       |         |
| Non-smoker                        | Reference                                                             |         |
| <15 cigarettes                    | 30.4% (-18.1%, 78.9%)                                                 | 0.22    |
| ⇒ 15 cigarettes                   | 52.9% (5.4%, 100.5%)                                                  | 0.03    |

Proportion of the associations of parental smoking during pregnancy and adult risk of type 2 diabetes (as presented in Table 2) explained by adult body mass index was explored by using a SAS macro that calculates the explained proportion by each intermediate variable (Mediate SAS; Harvard School of Public Health; available at <http://www.hsph.harvard.edu/faculty/donna-spiegelman/software/mediate>) (25). This analysis was performed for both statistically significant and non-significant effect estimates and gives for adult body mass index, as mediating factor, the explaining percentage and 95% Confidence Interval.
